# Supplementary material for: Heterochromatin components in germline stem cell maintenance
Source: PubMed Central journal article supplement (PMC4667240; doi:10.1038/srep17463), 2015-12-02
Supplement: srep17463-s1.pdf [file srep17463-s1.pdf]

## **Supplementary Information**

### **Heterochromatin components in germline stem cell maintenance**

Yalan Xing<sup>1,a</sup> and Willis X. Li<sup>1,2</sup>

<sup>1</sup> Department of Biomedical Genetics, University of Rochester Medical Center, Rochester, NY 14620

<sup>2</sup> Department of Medicine, University of California San Diego, La Jolla, CA 92093.

<sup>a</sup> Current Address: Department of Biochemistry, Institute for Stem Cell and Regenerative Medicine, University of Washington, Seattle, WA 98109

**Table S1. Requirement for HP1 in GSC maintenance**

| Days after clone induction | Clone genotype                | Testes with GSC clones/testes scored |
|----------------------------|-------------------------------|--------------------------------------|
| 1                          | WT control                    | 15/18 (83%)                          |
|                            | <i>Su(var)205<sup>5</sup></i> | 2/20 (10%)                           |
| 2                          | WT control                    | 36/37 (83%)                          |
|                            | <i>Su(var)205<sup>5</sup></i> | 3/16 (19%)                           |
| 5                          | WT control                    | 8/11 (73%)                           |
|                            | <i>Su(var)205<sup>5</sup></i> | 1/14 (7.1%)                          |
| 7                          | WT control                    | 27/31 (87%)                          |
|                            | <i>Su(var)205<sup>5</sup></i> | 0/38 (0%)                            |

“Twin-spot” clones homozygous for *Su(var)205<sup>05</sup>* (loss-of-function allele) or wild-type (control) were identified as GFP<sup>-</sup> cells. Testes with identifiable clones were scored. Those with at least one clone at GSC position were counted as “testes with GCS clone”.

Figure S1

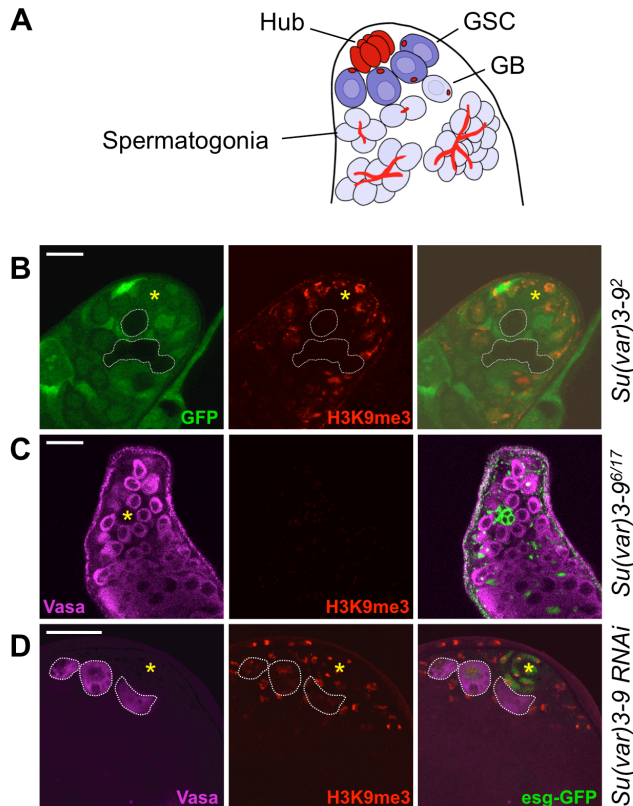

**Fig. S1. *Su(var)3-9* mutation or RNAi knock-down reduces heterochromatin**

Scale bar = 20  $\mu$ m

(A) Schematic representation of stem cell differentiation in the *Drosophila* testis. Germline stem cells (GSCs; blue) are adjacent to hub cells (red). GSCs differentiate to give rise to gonialblasts (GBs; light blue), which divide to give rise to spermatogonia. See text for more detail.

(B) Testes from *hsp70-flp; FRT<sup>82B</sup> ubi-GFP/FRT<sup>82B</sup> Su(var)3-9<sup>2</sup>* were dissected 2 days after heat-shock induction of somatic recombination and were stained for H3mK9 (red). Note that the *Su(var)3-9<sup>2</sup>* homozygous cells (GFP<sup>-</sup>; circled by dotted line) have no detectable H3mK9 signal.

(C) Testes from 2-day old *Su(var)3-9<sup>6/17</sup>* males were stained for Vasa (magenta) and H3mK9 (red), and the hub and fusome (green). Note that the testis lacks H3mK9 signal.

(D) Testes from 2-day old wild-type males expressing esg-GFP, nos-Gal4, and UAS-*Su(var)3-9* RNAi were stained for Vasa (magenta) and H3mK9 (red). Note that the remaining Vasa<sup>+</sup> cells (circled by dotted lines) exhibit much reduced H3mK9 signal compared with the rest of testis area.

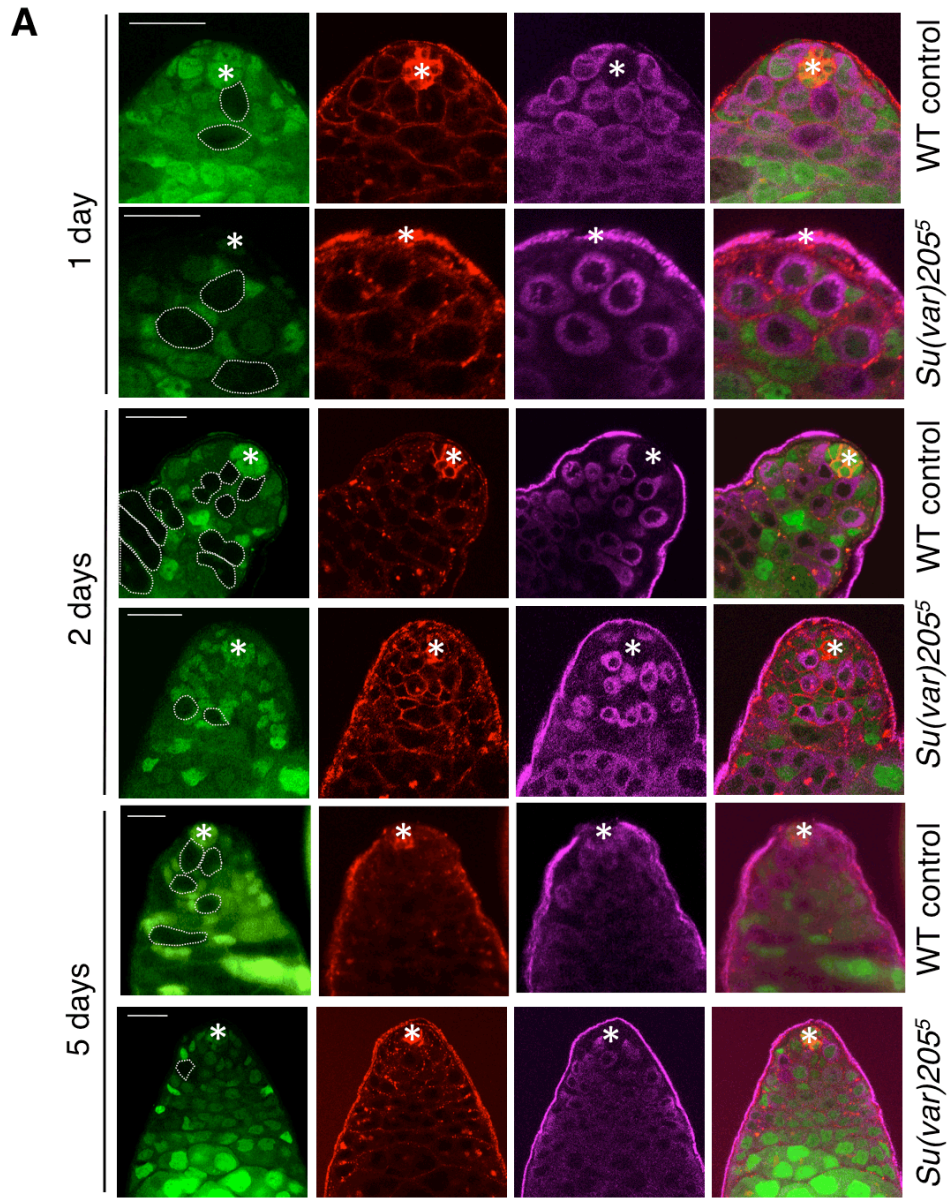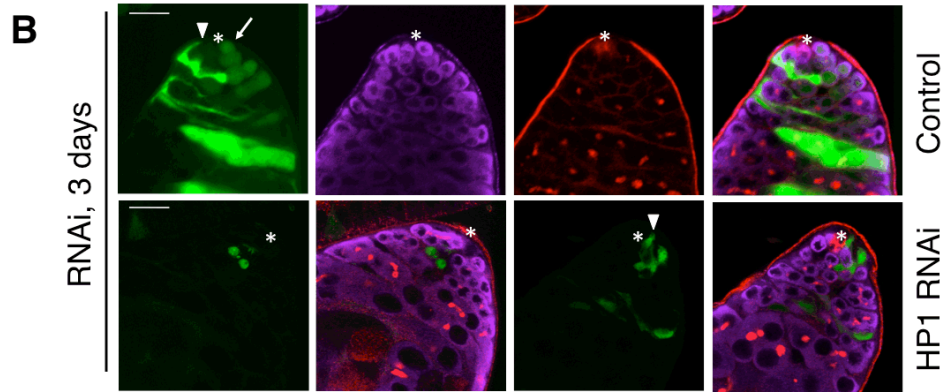

## Figure S2. Effects of loss of HP1 on GSC maintenance

Testes from male flies that had been subjected to induction of marked clones for loss-of-function of HP1 (GFP<sup>-</sup>) (a) or over-expression of HP1 RNAi (GFP<sup>+</sup>) (b) were immunostained for Vasa (magenta cytoplasmic staining) and for fusomes and hub cells (both red). Asterisk indicates the position of the hub. Scale bar=20  $\mu$ m.

**(A)** Testes were dissected after 1, 2, or 5 days after clone induction. Wild-type control and *Su(var)205*<sup>5</sup> homozygous mutant clonal cells were marked by the absence of GFP (lack of green). Note that wild-type control clones were found at GSC position (next to the hub), and that *Su(var)205*<sup>5</sup> homozygous mutant clones were found at the GSC position only 1 day after clone induction, but not after 2 or more days.

**(B)** In control testes (which did not express HP1 RNAi) 3 days after clone induction, clonal GFP<sup>+</sup> cells were found in both the germline (round Vasa<sup>+</sup> cells) and somatic (elongated Vasa<sup>-</sup> cells) lineages. Arrow marks a GSC, and arrowhead a CPC. Three days after HP1 RNAi was expressed, no HP1 RNAi-expressing (GFP<sup>+</sup>) GSCs were observed next to the hub. GFP<sup>+</sup> germline cells (round green cells in left panels) were found away from the hub, and they now cease to express Vasa. GFP<sup>+</sup> somatic cells (long Vasa<sup>-</sup> cells in right panels), however, were still observed.

Figure S3

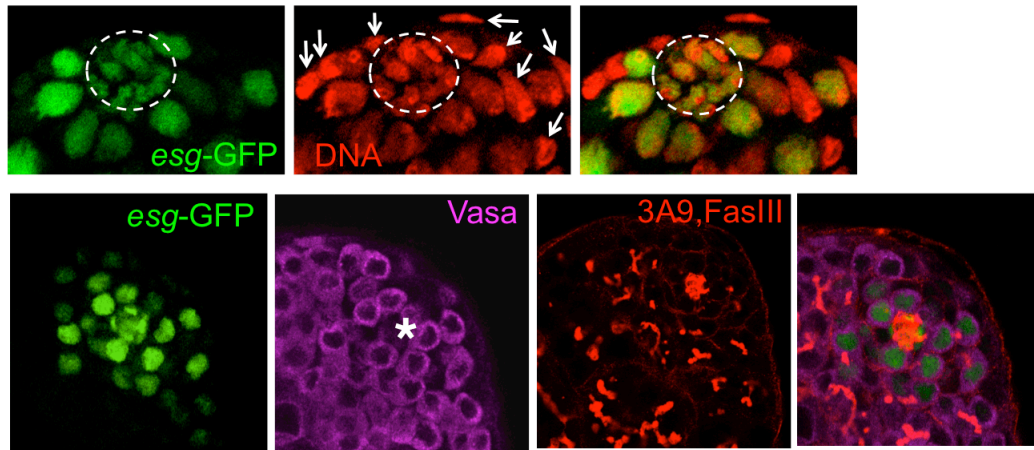

**Fig. S3. Expression and localization of *esg-GFP***

Testes from 2-day old *Drosophila* wild-type males expressing *esg-GFP* were stained for DNA (red; upper), or *Vasa* (magenta; lower), or fusome and hub cells (red; lower). Hub cells are circled with dashed line (upper) or marked by asterisk (lower). Arrows point to CySCs. Note that *esg-GFP*<sup>+</sup> cells colocalize with *Vasa*<sup>+</sup> cells, but not with CySCs (*Vasa*<sup>-</sup> cells).
